# Supplementary material for: Enhancement of textile-dyeing sludge dewaterability using a novel cationic polyacrylamide: role of cationic block structures
Source: Royal Society of Chemistry journal article supplement (doi:10.1039/c6ra27986d), 2017-01-01
Supplement: c6ra27986d1.pdf [file c6ra27986d1.pdf]

## Cover Page for Supporting Information

**Manuscript title:** Enhancement of textile-dyeing sludge dewaterability using a novel cationic polyacrylamide: role of cationic block structure

Li Feng<sup>a,b,c</sup>, Huaili Zheng<sup>a,b,c\*</sup>, Baoyu Gao<sup>d</sup>, Chuanliang Zhao<sup>a,b,c</sup>, Shixin Zhang<sup>a,b,c</sup>,  
Nan Chen<sup>a,b,c</sup>

a. Key Laboratory of the Three Gorges Reservoir Region's Eco-Environment, Ministry of Education, Chongqing University, Chongqing 400045, China

b. National Centre for International Research of Low-carbon and Green Buildings, Chongqing University, Chongqing 400045, China

c. Chongqing Engineering Research Center of Water Treatment Coagulant, Chongqing 400045, China

d. Shandong Key Laboratory of Water Pollution Control and Resource Reuse, School of Environmental Science and Engineering, Shandong University, Jinan 250100, China

\*Corresponding author. Tel.: +86 23 65120827; fax: +86 23 65120827.

E-mail address: zh16512@126.com (Huaili Zheng)

Total number of pages (including the cover page): 4 pages

This file contains 1 Table, 2 Texts and 2 Figures.

### Contents:

**Table S1.** The details of flocculants used in the dewatering tests.

**Text S1.** Huggins equation for molecular weight of the polymer.

**Text S2.** Analytical methods for FCMC and SRF.

**Fig. S1.** The proposed reaction routes for CPTA and TPTA.

**Fig. S2.** The sludge morphologies conditioned by CPTA and TPTA.

**Table S1**

The details of flocculants used in the dewatering tests

| Abbreviation | Cationic degree | Intrinsic viscosity (dL·g <sup>-1</sup> ) | Conversion rate (%) | Synthetic method |
|--------------|-----------------|-------------------------------------------|---------------------|------------------|
| CPTA         | 40              | 2.28                                      | 95.2                | UTP              |
| TPTA         | 40              | 2.23                                      | 95.8                | PT               |
| CCPDA        | 40              | 2.31                                      | /                   | PT               |
| CCPMA        | 40              | 2.29                                      | /                   | PT               |

UTP: ultrasonic-initiated template copolymerization.

PT: polymerization technique without ultrasonic and template.

**Text S1.** Huggins equation for molecular weight of the polymer.

**Molecular weight(M<sub>r</sub>):**

$$M_r = 802 \cdot [\eta]^{1.25}$$

Where  $[\eta]$  is the intrinsic viscosity of the polymer.

**Text S2.** Analytical methods for FCMC and SRF.

After a 10 min settling period, the conditioned sludge was poured into a Buchner funnel for filtering under a vacuum pressure of 0.09 MPa for 30 min or until the vacuum could not be maintained (in <30 min). FCMC was obtained by the Equation

$$FCMC\% = \frac{M_1 - M_2}{M_1} \quad \text{Equation 1}$$

where *FCMC* is the filter cake moisture content, *M<sub>1</sub>* is the weight of the wet filter cake after filtration, and *M<sub>2</sub>* is the weight of filter cake after drying at 105 °C for 4 h. SRF was calculated from the Equation 2<sup>2</sup>:

$$SRF = \frac{2bpA^2}{\mu c} \quad \text{Equation 2}$$

where  $SRF$  is the specific resistance to filtration,  $P$  is the filtration pressure ( $N/m^2$ ),  $A$  is the filtration area ( $m^2$ ),  $\mu$  is the viscosity of filtrate ( $N \cdot s/m^2$ ),  $b$  is the slope obtained from the plot of  $t/V_f(y) - V_f(x)$ , where  $V_f$  is the volume of filtrate ( $m^3$ ) and  $t$  is the filtration time (s), and filtrate volume was recorded at 5 s, 10 s, 20 s, 30 s, 40 s, 50 s, 60 s, 70 s and 80 s during the filtration, and  $c$  is the weight of solids per unit filtrate volume ( $kg/m^3$ ),  $c = [(1/C_i)/[(100C_i - C_f)/100C_f]]$ , where  $C_i$  is the initial moisture content (%) and  $C_f$  is the final moisture content (%).

### Figures

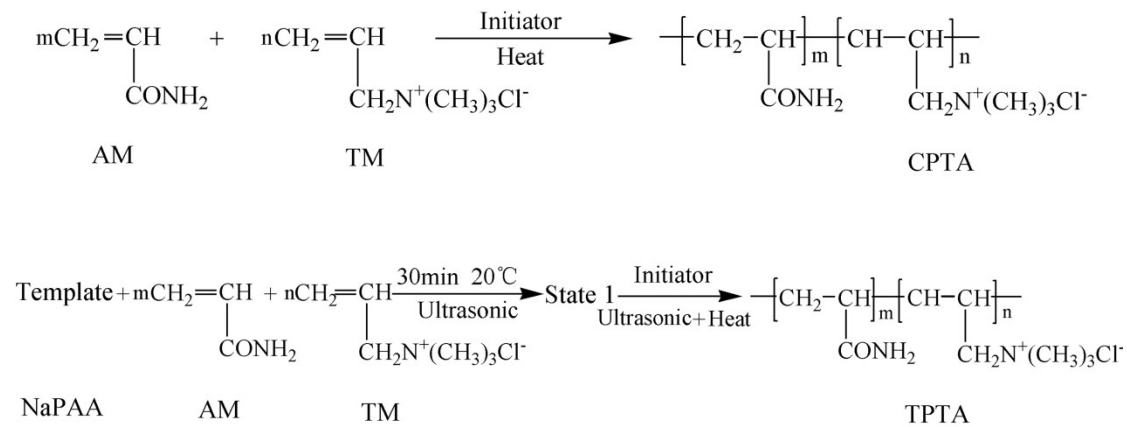

Fig. S 1. The proposed reaction routes for CPTA and TPTA

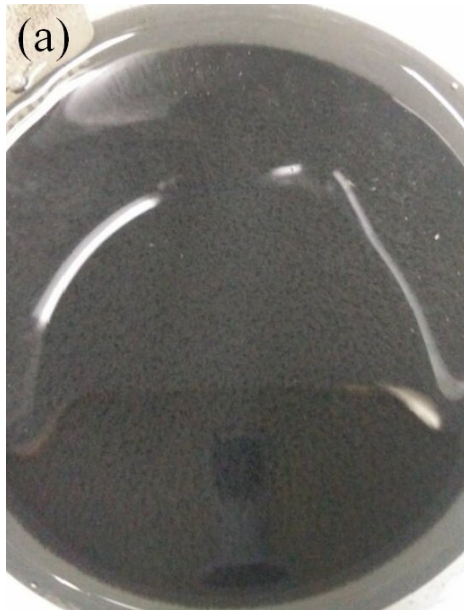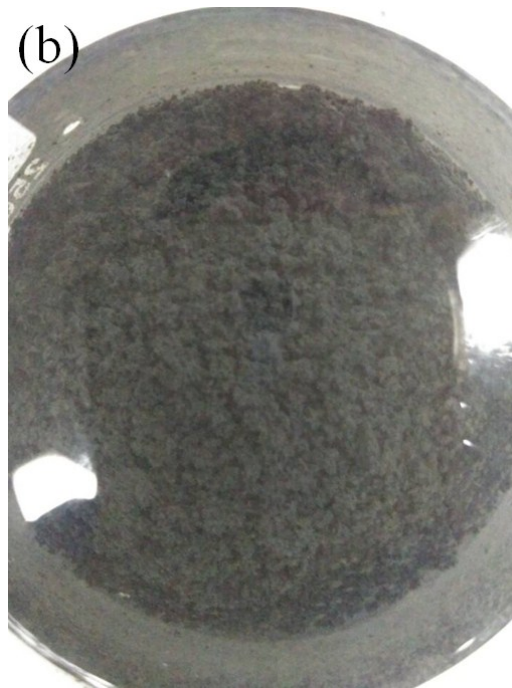

Fig. S 2. The sludge morphologies conditioned by (a) CPTA and (b) TPTA.

### References

- 1 D. F. Wang, T. Q. Zhao, L. Q. Yan, Z. M. Mi, Q. Gu and Y. M. Zhang, *INT J BIOL MACROMOL*, 2016, **92**, 761-768.
- 2 H. Zhang, J. K. Yang, W. B. Yu, S. Luo, L. Peng, X. X. Shen, Y. F. Shi, S. N. Zhang, J. Song, N. Ye, Y. Li, C. Z. Yang and S. Liang, *WATER Res*, 2014, **59**,

239-247.
